# Supplementary material
Source: Royal Society of Chemistry journal article supplement (doi:10.1039/d6tc00199h)
Supplement: d6tc00199h1.pdf [file d6tc00199h1.pdf]

# Supporting Information

## **Ionicly conductive hydrogels constructed with the participation of aliphatic polycarbonates for multi-scenario flexible electronics and bioelectrical signal sensing**

Siyu Han<sup>a</sup>, Tao Wang<sup>a</sup>, Yuzhu Dong<sup>a</sup>, Xiaoxu Xu<sup>b</sup>, Jia Li<sup>b</sup>, Bai Wang<sup>c\*</sup>, Jianshe Hu<sup>a\*</sup>

<sup>a</sup>Center for Molecular Science and Engineering, College of Science, Northeastern University, Shenyang 110819, P. R. China

<sup>b</sup>College of Chemical Engineering and Machinery, Liaodong University, Dandong, 118001, P. R. China

<sup>c</sup>Shenyang Fire Science and Technology Research Institute of MEM. National Engineering Laboratory for Fire and Emergency Rescue, Shenyang 110034, P. R.China

Corresponding author: E-mail for [canghaichenfei@163.com](mailto:canghaichenfei@163.com) (B. Wang) and [hujs@mail.neu.edu.cn](mailto:hujs@mail.neu.edu.cn)

(J.S Hu)

## 1. Synthesis of MCC

5-methyl-5-carboxytrimethylene carbonate [1], prepared following a reported procedure, was dissolved in tetrahydrofuran (THF). Pd/C and Pd(OH)<sub>2</sub>/C were then introduced at room temperature, each at 0.5 wt% relative to the monomer. The mixture was stirred under a H<sub>2</sub> atmosphere for 48 h. Upon completion, the catalysts were removed by filtration, and the solvent was removed under reduced pressure to afford a white solid crude product. The crude material was recrystallized from ethyl acetate to yield the target compound, MCC.

## 2. Synthesis of PEG-b-PMCC

MCC and PEG6000 were charged into a polymerization tube at a molar ratio of 15:1. A toluene solution of stannous octoate was then added, with the molar ratio of MCC to stannous octoate set to 500:1. The tube was subjected to three vacuum–inert gas purge cycles to remove residual oxygen and moisture, and then flame-sealed under vacuum. The sealed tube was heated at 140 °C for 12 h. After cooling to room temperature, the tube was opened to collect the polymerization product.

## 3. <sup>1</sup>H NMR of PEG-b-PMCC

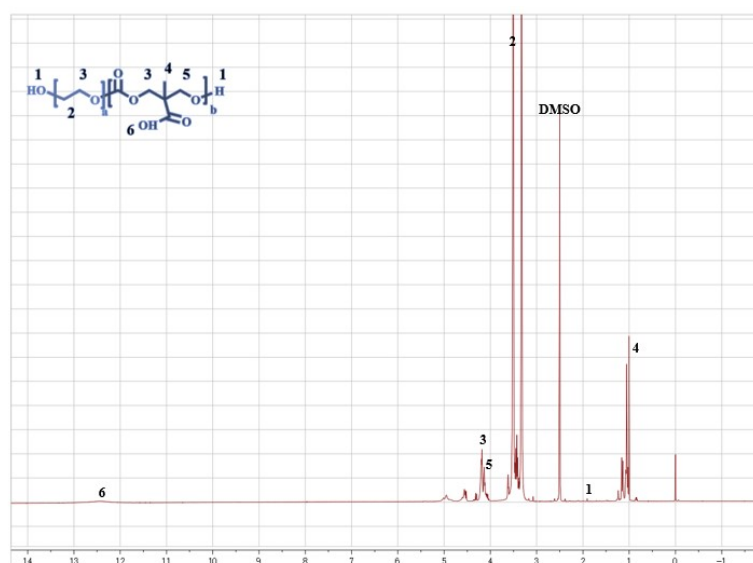

Figure S1 <sup>1</sup>H NMR of PEG-b-PMCC

#### 4. LC-MS results of $Al(TFSI)_3$

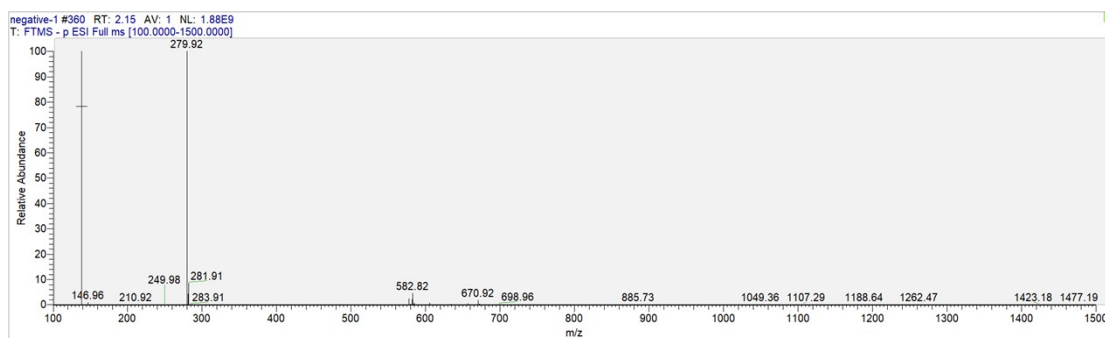

Figure S2 LC-MS results of  $Al(TFSI)_3$

#### 5. EDS results of $Al(TFSI)_3$

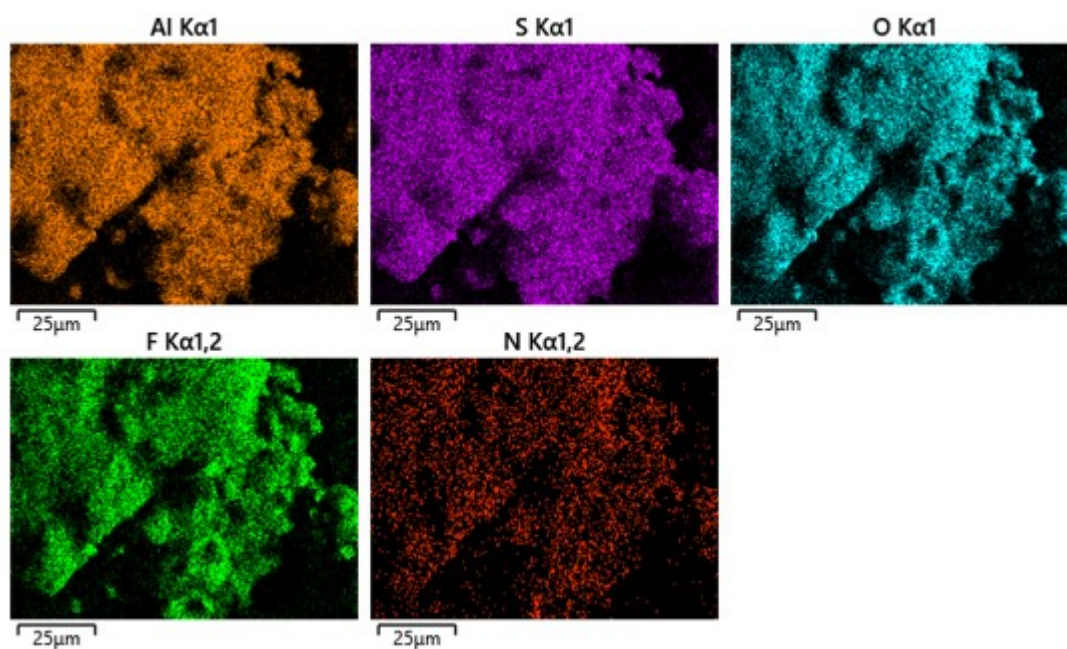

Figure S3 EDS results of  $Al(TFSI)_3$

#### 6. Performance comparison

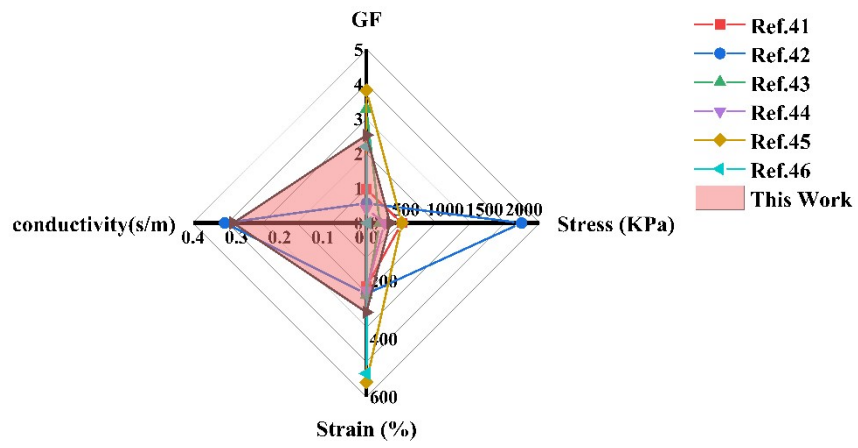

Figure S4 Performance comparison

## References

- [1] Yao, P. Li, X. Liu, J. Hu, L. Yang. COLLOID. POLYM. SCI. 293 (2015) 3049-3059
